# Supplementary material for: New Analytical Approach to Quinolizidine Alkaloids and Their Assumed Biosynthesis Pathways in Lupin Seeds
Source: MDPI journal article supplement (doi:10.3390/toxins16030163), 2024-03-21
Supplement: s1 [file s1]

## Supplementary Material

Table S1a. Analytical QA standards.

| Quinolizidine alkaloid                           | CAS no.    | Supplier <sup>a</sup> | Article code | Purity (%) |
|--------------------------------------------------|------------|-----------------------|--------------|------------|
| (-)-Albine hydrochloride                         | 53915-26-7 | PhytoLab              | 86291        | >98%       |
| (-)-Anagyrine hydrochloride                      | 74195-83-8 | PhytoLab              | 83211        | 99.4%      |
| (-)-Angustifoline                                | 550-43-6   | PhytoPlan             | Art. 6320.95 | 99.2%      |
| (-)-Cytisine                                     | 485-35-8   | PhytoLab              | 80401        | 99%        |
| (+)-Epilupinine chloride                         | 486-71-5   | PhytoPlan             | n/a          | >90%       |
| Gramine                                          | 87-52-5    | PhytoLab              | 80465        | 98%        |
| (+)-13 $\alpha$ -Hydroxylupanine                 | 15358-48-2 | PhytoPlan             | Art. 6321.95 | 97.6%      |
| (+)- $\alpha$ -Isolupanine                       | 486-87-3   | LGC                   | TRC-1820900  | 98%        |
| (+)-Lupanine hydrochloride                       | 550-90-3   | PhytoPlan             | Art. 6351.95 | 96.2%      |
| (-)-Lupinine                                     | 486-70-4   | PhytoLab              | 86294        | 97.1%      |
| (-)-N-Methylcytisine                             | 486-86-2   | PhytoLab              | 83219        | 99.8%      |
| (-)-Multiflorine                                 | 529-80-6   | PhytoPlan             | Art. 6324.95 | 99.6%      |
| (-)-Sparteine                                    | 90-39-1    | Sigma Aldrich         | 76466        | 98%        |
| (-)-Thermopsine                                  | 486-90-8   | MCE                   | HY-N5009     | 99.4%      |
| 13 $\alpha$ - <i>trans</i> -Cinnamoyloxylupanine | 5835-04-1  | Biosynth              | FC65854      | >98%       |

a: Supplier details:

PhytoLab, Vestenbergsgreuth, Germany

PhytoPlan, Heidelberg, Germany

LGC Standards, Wesel, Germany

Sigma Aldrich, Zwijndrecht, The Netherlands

MCE: MedChemExpress LLC, Monmouth Junction, NJ, USA

Biosynth, Compton, United Kingdom

Table S1b. QAs tentatively identified in the samples.

| Quinolizidine alkaloid                         | CAS no.     |
|------------------------------------------------|-------------|
| Isoangustifoline                               | 82189-28-4  |
| 12,13-seco-12,13-didehydromultiflorine         | 6822-63-5   |
| Tetrahydrorhombifoline                         | 3382-84-1   |
| 5,6-Didehydromultiflorine                      | 66216-62-4  |
| 13 $\alpha$ -Hydroxymultiflorine               | 71657-64-2  |
| 3 $\beta$ -Hydroxylupanine                     | 129443-39-6 |
| 3 $\beta$ ,13 $\alpha$ -Dihydroxylupanine      | 101512-24-7 |
| 13 $\alpha$ -Tigloyloxylupanine                | 57943-34-7  |
| 13 $\alpha$ -Angeloyloxylupanine               | 72822-06-1  |
| 13 $\alpha$ -Tigloxymultiflorine               | 136396-56-0 |
| 13 $\alpha$ -Angeloyloxymultiflorine           | n.a.        |
| 13 $\alpha$ - <i>cis</i> -Cinnamoyloxylupanine | 86707-49-5  |

Table S2. Validation results: recovery and repeatability (n=6) for soybeans spiked at three concentration levels.

| Level spiked (mg/kg)                   | 1 mg/kg             |                                        | 5 mg/kg             |                                        | 25 mg/kg            |                                        |
|----------------------------------------|---------------------|----------------------------------------|---------------------|----------------------------------------|---------------------|----------------------------------------|
| Quinolizidine alkaloid                 | Recovery (%<br>n=6) | Relative standard deviation (%<br>n=6) | Recovery (%<br>n=6) | Relative standard deviation (%<br>n=6) | Recovery (%<br>n=6) | Relative standard deviation (%<br>n=6) |
| Gramine                                | 79.0                | 9.1                                    | 82.7                | 5.9                                    | 88.9                | 3.5                                    |
| Epilupinine                            | 91.8                | 11.6                                   | 96.0                | 10.9                                   | 91.9                | 7.6                                    |
| Lupinine                               | 90.9                | 8.1                                    | 99.2                | 10.7                                   | 95.9                | 3.2                                    |
| Cytisine                               | 99.7                | 13.7                                   | 99.2                | 7.6                                    | 98.3                | 5.5                                    |
| Methylcytisine                         | 87.3                | 8.0                                    | 92.1                | 4.6                                    | 87.8                | 2.1                                    |
| Albine                                 | 88.5                | 8.1                                    | 95.5                | 7.6                                    | 96.5                | 3.6                                    |
| Angustifoline                          | 89.0                | 6.7                                    | 94.9                | 6.9                                    | 91.8                | 4.6                                    |
| Sparteine                              | 82.0                | 7.5                                    | 87.6                | 4.3                                    | 87.9                | 4.6                                    |
| Anagyrine                              | 92.8                | 6.7                                    | 99.9                | 8.0                                    | 93.2                | 4.5                                    |
| Thermopsine                            | 88.7                | 6.1                                    | 96.4                | 6.6                                    | 93.2                | 3.9                                    |
| Multiflorine                           | 89.9                | 6.7                                    | 93.7                | 4.9                                    | 92.7                | 4.2                                    |
| Lupanine                               | 93.0                | 9.6                                    | 94.9                | 5.6                                    | 94.9                | 5.0                                    |
| Isolupanine                            | 98.9                | 5.9                                    | 104.9               | 6.2                                    | 100.5               | 3.7                                    |
| 13-Hydroxylupanine                     | 93.3                | 7.1                                    | 99.9                | 6.8                                    | 99.1                | 4.7                                    |
| 13- <i>trans</i> -Cinnamoyloxylupanine | 53.5                | 2.9                                    | 49.7                | 3.7                                    | 44.2                | 7.1                                    |

Table S3. Linearity of calibration lines in blank soybean extract, 0-200 ng/mL, 9-point calibration, combined lines before and after analysis of the samples.

| Quinolizidine alkaloid                 | Slope (cts/ng-mL) | Intercept (cts) | Correlation coefficient |
|----------------------------------------|-------------------|-----------------|-------------------------|
| Gramine                                | 9520              | -12246          | 0.9993                  |
| Epilupinine                            | 6352              | 11165           | 0.9988                  |
| Lupinine                               | 35879             | 31710           | 0.9988                  |
| Cytisine                               | 36128             | 99120           | 0.9968                  |
| Methylcytisine                         | 22074             | 83800           | 0.9960                  |
| Albine                                 | 36195             | 23801           | 0.9996                  |
| Angustifoline                          | 41150             | 27440           | 0.9987                  |
| Sparteine                              | 45416             | 5477            | 0.9991                  |
| Anagyrine                              | 55660             | 119139          | 0.9982                  |
| Thermopsine                            | 48218             | 98798           | 0.9980                  |
| Multiflorine                           | 66602             | 46408           | 0.9994                  |
| Lupanine                               | 64045             | 23306           | 0.9991                  |
| Isolupanine                            | 84784             | 61504           | 0.9992                  |
| 13-Hydroxylupanine                     | 59063             | 38693           | 0.9987                  |
| 13- <i>trans</i> -Cinnamoyloxylupanine | 63428             | 17095           | 0.9954                  |

Table S4. Quinolizidine alkaloids were detected in the lupin species and control plants when analyzed using both LC-MS/MS and GC/MS. Amounts are given in mg/kg of seed dry weight.

| Species           | Population | Total QAs | Epilupinine | Lupinine | Sparteine | Multiflorine | 11,12-seco-12,13-dehydromultiflorine* | 13 $\alpha$ -Hydroxymultiflorine* | 13 $\alpha$ -Tigloyloxymultiflorine* | 13 $\alpha$ -Angeloyloxymultiflorine* | 5,6-Didehydromultiflorine* | Albine | Angustifoline | Isoangustifoline* | Lupanine | Isolupanine | 3 $\beta$ -Hydroxylupanine* | 13 $\alpha$ -Hydroxylupanine | 3 $\beta$ ,13 $\alpha$ -Dihydroxylupanine* | 13 $\alpha$ -Tigloyloxylupanine* | 13 $\alpha$ -cis-cinnamoyloxylupanine* | Gramine | Tetrahydrorhombifoline* |
|-------------------|------------|-----------|-------------|----------|-----------|--------------|---------------------------------------|-----------------------------------|--------------------------------------|---------------------------------------|----------------------------|--------|---------------|-------------------|----------|-------------|-----------------------------|------------------------------|--------------------------------------------|----------------------------------|----------------------------------------|---------|-------------------------|
| <i>L. pilosus</i> | PIL-01     | 11471     | 2250        | 11       | 26        | 8328         | 239                                   | 349                               | 200                                  | 6                                     | 44                         | 6      | 0             | 0                 | 7        | 0           | 0                           | 0                            | 0                                          | 0                                | 0                                      | 0       | 0                       |
| <i>L. pilosus</i> | PIL-02     | 9739      | 2866        | 11       | 201       | 6005         | 338                                   | 178                               | 79                                   | 2                                     | 35                         | 8      | 0             | 0                 | 8        | 0           | 0                           | 0                            | 0                                          | 0                                | 0                                      | 0       | 0                       |
| <i>L. pilosus</i> | PIL-03     | 10725     | 3184        | 11       | 393       | 6647         | 226                                   | 166                               | 46                                   | 1                                     | 34                         | 6      | 0             | 0                 | 5        | 0           | 0                           | 0                            | 0                                          | 0                                | 0                                      | 0       | 0                       |
| <i>L. pilosus</i> | PIL-04     | 9172      | 2039        | 9        | 123       | 6389         | 245                                   | 219                               | 94                                   | 2                                     | 31                         | 7      | 0             | 0                 | 8        | 0           | 0                           | 0                            | 0                                          | 0                                | 0                                      | 0       | 0                       |
| <i>L. pilosus</i> | PIL-05     | 11618     | 3304        | 16       | 64        | 7257         | 262                                   | 421                               | 213                                  | 8                                     | 51                         | 8      | 0             | 0                 | 7        | 0           | 0                           | 0                            | 0                                          | 0                                | 0                                      | 0       | 0                       |
| <i>L. pilosus</i> | PIL-10     | 10584     | 2874        | 9        | 9         | 7016         | 145                                   | 326                               | 141                                  | 4                                     | 45                         | 3      | 0             | 0                 | 6        | 0           | 0                           | 0                            | 0                                          | 0                                | 0                                      | 0       | 0                       |
| <i>L. pilosus</i> | PIL-11     | 10421     | 3891        | 14       | 466       | 5463         | 297                                   | 171                               | 59                                   | 1                                     | 37                         | 9      | 0             | 0                 | 7        | 0           | 0                           | 0                            | 0                                          | 0                                | 0                                      | 0       | 0                       |
| <i>L. pilosus</i> | PIL-13     | 10714     | 2348        | 19       | 22        | 7714         | 45                                    | 323                               | 175                                  | 6                                     | 49                         | 1      | 0             | 0                 | 7        | 0           | 0                           | 0                            | 0                                          | 0                                | 0                                      | 0       | 0                       |
| <i>L. pilosus</i> | PIL-14     | 11166     | 2507        | 11       | 13        | 8017         | 173                                   | 263                               | 135                                  | 3                                     | 28                         | 3      | 0             | 0                 | 6        | 0           | 0                           | 0                            | 0                                          | 0                                | 0                                      | 0       | 0                       |
| <i>L. pilosus</i> | PIL-18     | 9521      | 2518        | 8        | 459       | 6146         | 178                                   | 116                               | 53                                   | 3                                     | 30                         | 4      | 0             | 0                 | 3        | 0           | 0                           | 0                            | 0                                          | 0                                | 0                                      | 0       | 0                       |
| <i>L. pilosus</i> | PIL-19     | 10222     | 2630        | 8        | 158       | 6973         | 259                                   | 118                               | 35                                   | 2                                     | 24                         | 5      | 0             | 0                 | 5        | 0           | 0                           | 0                            | 0                                          | 0                                | 0                                      | 0       | 0                       |
| <i>L. pilosus</i> | PIL-20     | 9802      | 2533        | 7        | 10        | 6680         | 159                                   | 262                               | 109                                  | 5                                     | 25                         | 3      | 0             | 0                 | 4        | 0           | 0                           | 0                            | 0                                          | 0                                | 0                                      | 0       | 0                       |
| <i>L. pilosus</i> | PIL-21     | 9122      | 3182        | 7        | 108       | 5038         | 466                                   | 211                               | 63                                   | 3                                     | 23                         | 12     | 0             | 0                 | 4        | 0           | 0                           | 1                            | 0                                          | 0                                | 0                                      | 0       | 0                       |
| <i>L. pilosus</i> | PIL-23     | 9212      | 2914        | 9        | 196       | 5578         | 247                                   | 171                               | 47                                   | 2                                     | 28                         | 8      | 0             | 0                 | 6        | 0           | 0                           | 1                            | 0                                          | 0                                | 0                                      | 0       | 0                       |
| <i>L. pilosus</i> | PIL-25     | 10380     | 3152        | 11       | 264       | 6525         | 176                                   | 149                               | 42                                   | 3                                     | 42                         | 7      | 0             | 0                 | 6        | 0           | 0                           | 1                            | 0                                          | 0                                | 0                                      | 0       | 0                       |

|                        |        |       |      |    |     |      |     |      |    |    |    |      |     |    |       |    |     |      |   |     |   |   |    |
|------------------------|--------|-------|------|----|-----|------|-----|------|----|----|----|------|-----|----|-------|----|-----|------|---|-----|---|---|----|
| <i>L. pilosus</i>      | PIL-26 | 12193 | 3422 | 9  | 285 | 8223 | 96  | 76   | 25 | 1  | 41 | 4    | 0   | 0  | 5     | 0  | 0   | 1    | 0 | 0   | 0 | 0 | 0  |
| <i>L. pilosus</i>      | PIL-30 | 9889  | 3277 | 9  | 187 | 5434 | 613 | 239  | 76 | 4  | 24 | 14   | 0   | 0  | 5     | 0  | 0   | 1    | 0 | 0   | 0 | 0 | 0  |
| <i>L. pilosus</i>      | PIL-33 | 8383  | 2741 | 11 | 241 | 4774 | 325 | 178  | 64 | 3  | 23 | 8    | 1   | 0  | 7     | 0  | 0   | 2    | 0 | 0   | 0 | 0 | 0  |
| <i>L. pilosus</i>      | PIL-34 | 10318 | 2558 | 9  | 113 | 7030 | 280 | 213  | 63 | 3  | 26 | 9    | 0   | 0  | 7     | 0  | 0   | 1    | 0 | 0   | 0 | 0 | 0  |
| <i>L. pilosus</i>      | PIL-36 | 11242 | 2150 | 8  | 130 | 8297 | 260 | 284  | 68 | 3  | 25 | 6    | 0   | 0  | 5     | 0  | 0   | 1    | 0 | 0   | 0 | 0 | 0  |
| <i>L. palaestinus</i>  | PA-02  | 6964  | 419  | 3  | 339 | 5845 | 162 | 115  | 42 | 0  | 29 | 4    | 0   | 0  | 3     | 0  | 0   | 1    | 0 | 0   | 0 | 0 | 0  |
| <i>L. palaestinus</i>  | PA-03  | 6656  | 490  | 4  | 247 | 5666 | 112 | 79   | 33 | 0  | 18 | 2    | 0   | 0  | 3     | 0  | 0   | 1    | 0 | 0   | 0 | 0 | 0  |
| <i>L. palaestinus</i>  | PA-04  | 3990  | 783  | 4  | 300 | 2776 | 38  | 53   | 17 | 0  | 15 | 1    | 0   | 0  | 2     | 0  | 0   | 1    | 0 | 0   | 0 | 0 | 0  |
| <i>L. palaestinus</i>  | PA-05  | 4858  | 320  | 2  | 206 | 4100 | 96  | 72   | 36 | 0  | 16 | 2    | 0   | 0  | 4     | 0  | 0   | 2    | 0 | 0   | 0 | 0 | 0  |
| <i>L. palaestinus</i>  | PA-07  | 6975  | 300  | 2  | 281 | 6117 | 100 | 99   | 40 | 0  | 26 | 3    | 0   | 0  | 4     | 0  | 0   | 1    | 0 | 0   | 0 | 0 | 0  |
| <i>L. palaestinus</i>  | PA-10  | 6803  | 261  | 3  | 281 | 6002 | 103 | 82   | 34 | 0  | 21 | 3    | 1   | 0  | 7     | 0  | 0   | 4    | 0 | 0   | 0 | 0 | 0  |
| <i>L. palaestinus</i>  | PA-11  | 6200  | 322  | 3  | 245 | 5392 | 99  | 79   | 31 | 0  | 22 | 2    | 0   | 0  | 3     | 0  | 0   | 1    | 0 | 0   | 0 | 0 | 0  |
| <i>L. palaestinus</i>  | PA-12  | 5973  | 479  | 2  | 192 | 5065 | 96  | 81   | 33 | 0  | 18 | 2    | 0   | 0  | 3     | 0  | 0   | 1    | 0 | 0   | 0 | 0 | 0  |
| <i>L. palaestinus</i>  | PA-15  | 5532  | 450  | 3  | 207 | 4686 | 60  | 81   | 23 | 0  | 16 | 1    | 0   | 0  | 3     | 0  | 0   | 1    | 0 | 0   | 0 | 0 | 0  |
| <i>L. palaestinus</i>  | PA-16  | 5203  | 1039 | 4  | 149 | 3803 | 92  | 62   | 27 | 0  | 13 | 3    | 1   | 0  | 7     | 0  | 0   | 3    | 0 | 0   | 0 | 0 | 0  |
| <i>L. palaestinus</i>  | PA-17  | 7788  | 1016 | 7  | 230 | 6181 | 112 | 92   | 38 | 0  | 23 | 12   | 4   | 0  | 47    | 0  | 1   | 18   | 0 | 1   | 0 | 0 | 0  |
| <i>L. albus-bitter</i> | ALB-05 | 23876 | 0    | 0  | 16  | 936  | 711 | 1087 | 57 | 40 | 9  | 2352 | 640 | 20 | 13092 | 85 | 209 | 4282 | 0 | 300 | 0 | 0 | 40 |
| <i>L. albus-bitter</i> | ALB-07 | 25310 | 0    | 0  | 20  | 713  | 575 | 1006 | 47 | 40 | 8  | 2338 | 645 | 21 | 14345 | 88 | 229 | 4857 | 1 | 332 | 0 | 0 | 45 |

|                         |        |       |     |       |      |     |     |    |   |   |   |    |      |    |       |    |    |           |      |     |     |      |     |
|-------------------------|--------|-------|-----|-------|------|-----|-----|----|---|---|---|----|------|----|-------|----|----|-----------|------|-----|-----|------|-----|
| <i>L. albus-sweet</i>   | ALB-12 | 96    | 0   | 0     | 0    | 2   | 11  | 5  | 1 | 0 | 0 | 8  | 4    | 0  | 31    | 1  | 2  | 20        | 0    | 8   | 0   | 0    | 1   |
| <i>L. albus-sweet</i>   | ALB-sh | 95    | 0   | 0     | 0    | 4   | 8   | 3  | 1 | 0 | 0 | 3  | 8    | 0  | 29    | 2  | 2  | 26        | 0    | 6   | 0   | 0    | 1   |
| <i>L. angustifolius</i> | ANG-sh | 32840 | 12  | 0     | 5    | 522 | 127 | 77 | 1 | 0 | 3 | 21 | 7243 | 89 | 6384  | 68 | 48 | 1805<br>2 | 1    | 26  | 153 | 0    | 8   |
| <i>L. luteus</i>        | LUT-03 | 17106 | 468 | 13911 | 2    | 59  | 3   | 1  | 0 | 0 | 0 | 0  | 11   | 0  | 5     | 0  | 0  | 38        | 0    | 0   | 0   | 2606 | 0   |
| <i>L. mutabilis</i>     | MUT-01 | 24536 | 5   | 23    | 6794 | 49  | 2   | 1  | 0 | 0 | 0 | 0  | 20   | 1  | 11016 | 95 | 9  | 3201      | 1432 | 341 | 741 | 15   | 791 |
| <i>G. max</i> **        | MAX-01 | 10    | 0   | 0     | 2    | 1   | 0   | 0  | 0 | 0 | 0 | 0  | 0    | 0  | 4     | 0  | 0  | 1         | 1    | 0   | 1   | 0    | 0   |
| <i>C. arietinum</i> **  | ARI-01 | 7     | 0   | 0     | 1    | 3   | 0   | 0  | 0 | 0 | 0 | 0  | 0    | 0  | 2     | 0  | 0  | 1         | 0    | 0   | 0   | 0    | 0   |

\* Semi-quantitative results. \*\* The low levels of QAs detected in *G. max* and *C. arietinum* are likely due to cross-contamination caused by the *L. mutabilis* sample during sample preparation/analysis.

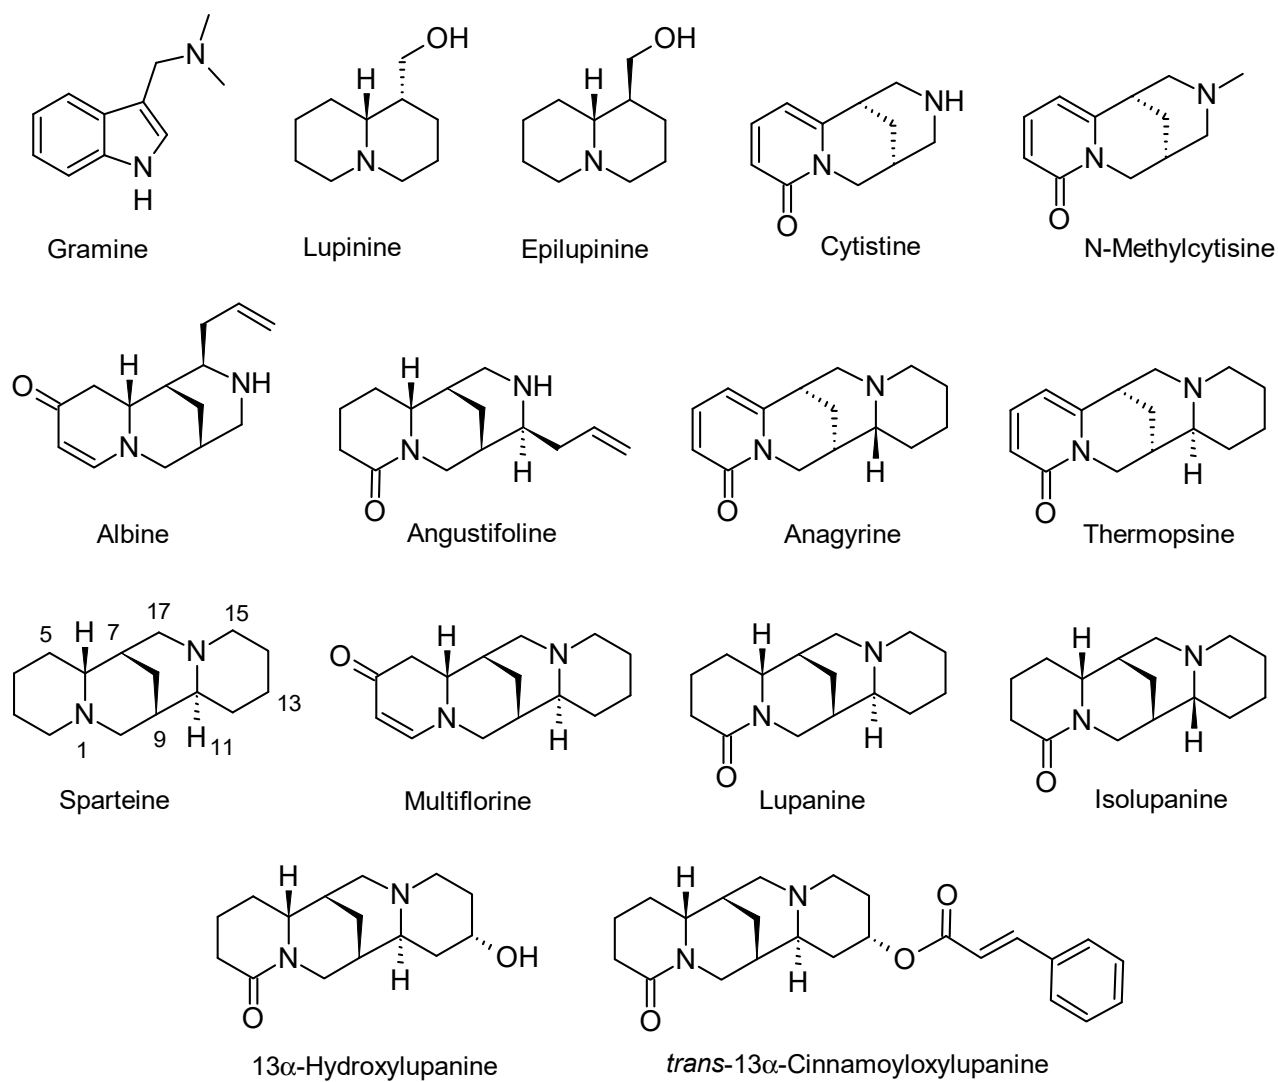

Supplementary Figure S1A: Quinolizidine alkaloid reference standards.

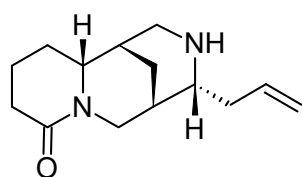

Isoangustifoline

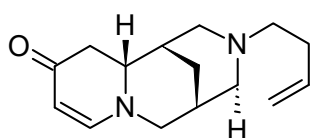

11,12-seco-12,13-Didehydromultiflorine

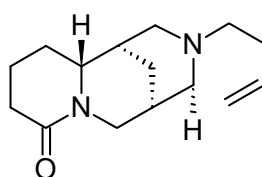

Tetrahydorhombifoline

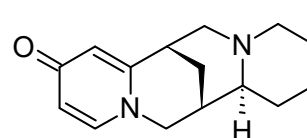

5,6-Didehydromultiflorine

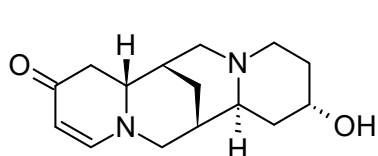

13 $\alpha$ -Hydroxymultiflorine

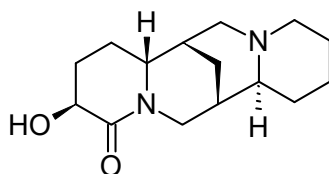

3 $\beta$ -Hydroxylupanine

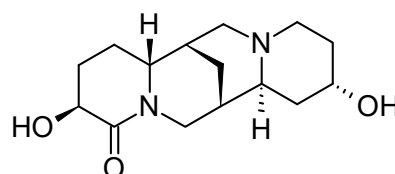

3 $\beta$ ,13 $\alpha$ -Dihydroxylupanine

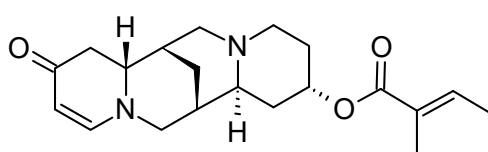

13 $\alpha$ -Tigloyloxymultiflorine

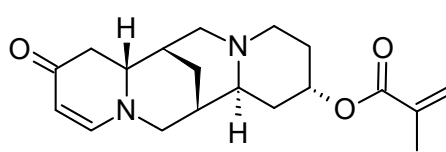

13 $\alpha$ -Angeloyloxymultiflorine

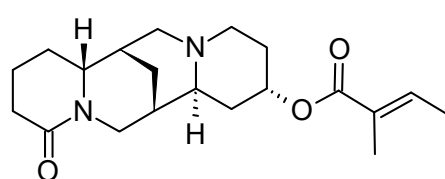

13 $\alpha$ -Tigloyloxylupanine

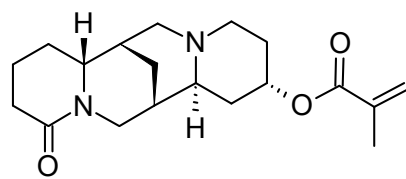

13 $\alpha$ -Angeloyloxylupanine

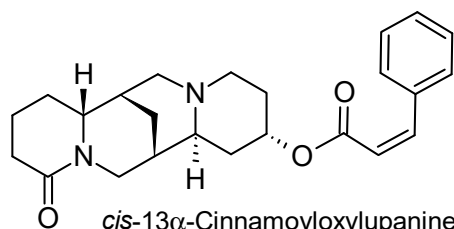

*cis*-13 $\alpha$ -Cinnamoyloxylupanine

Supplementary Figure S1B: Additional quinolizidine alkaloids included in the method.

Supplementary Figures S2A-G. Representative LC-MS/MS MRM chromatograms of the six main lupin species were analyzed.

# Cal 6 Sojameel 25 ng/ml

TQXS\_EURL\_220131\_LAs\_Lupine seeds Israel\_serie 2\_084

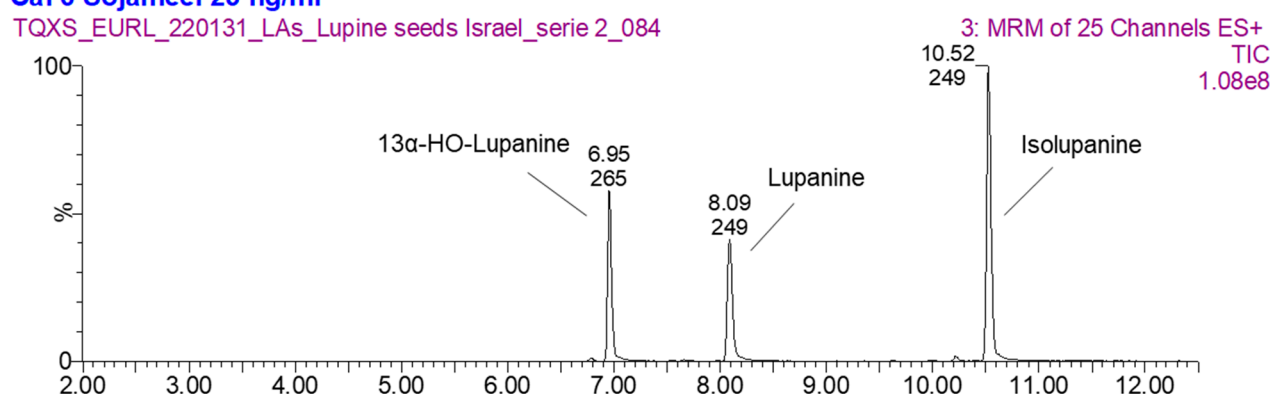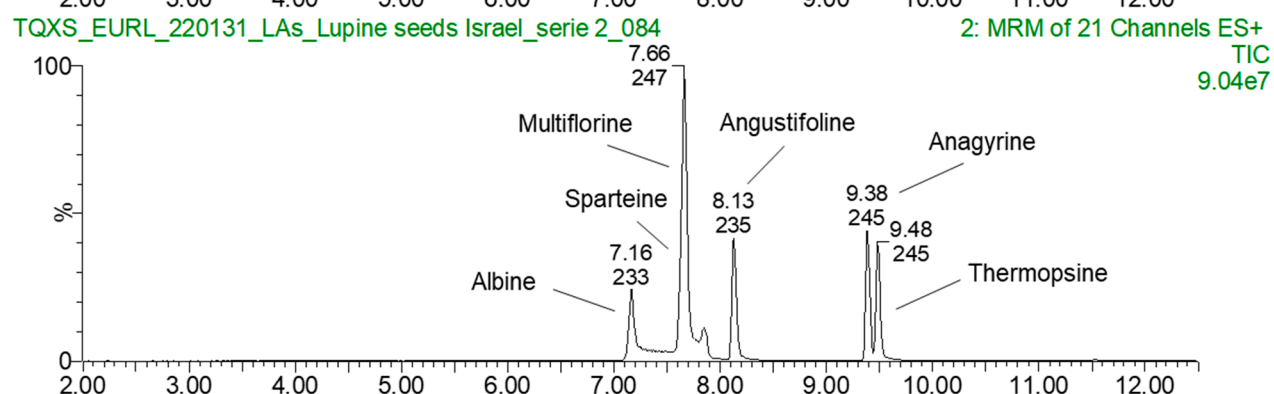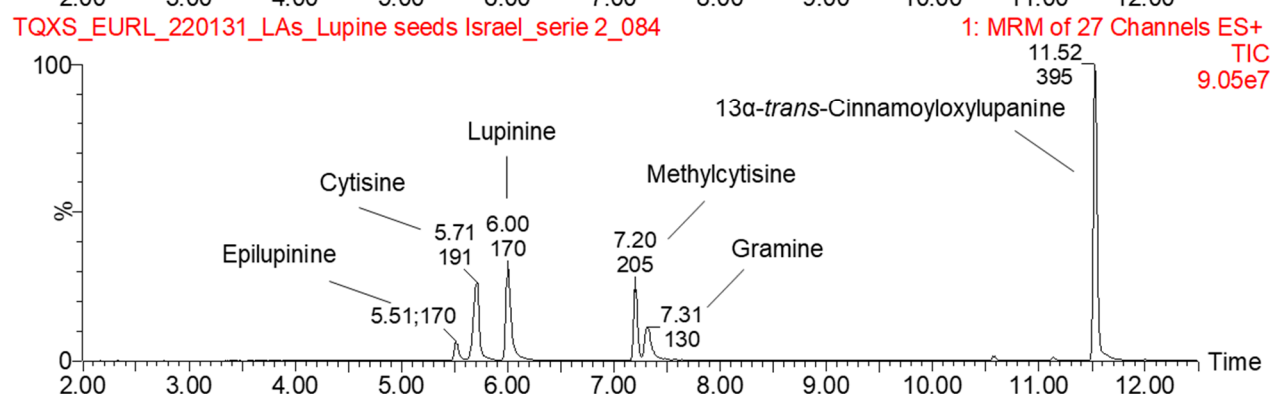

Supplementary Figure S2A. A mixture of QA reference standards (25 ng/mL in blank soy extract).



46 / 10-1 / PIL-18 dil 5x

TQXS\_EURL\_220131\_LAs\_Lupine seeds Israel\_serie 2\_094

3: MRM of 25 Channels ES+  
Sum  
2.86e7

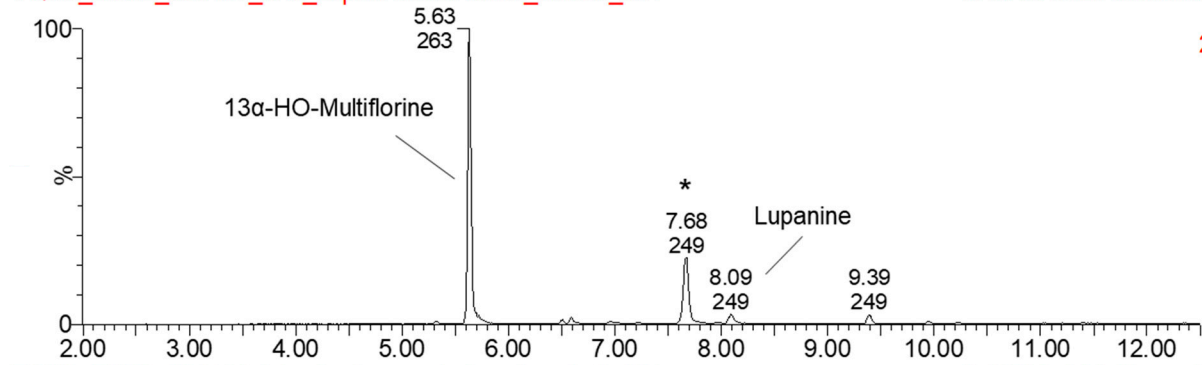

TQXS\_EURL\_220131\_LAs\_Lupine seeds Israel\_serie 2\_094

2: MRM of 21 Channels ES+  
TIC  
1.14e9

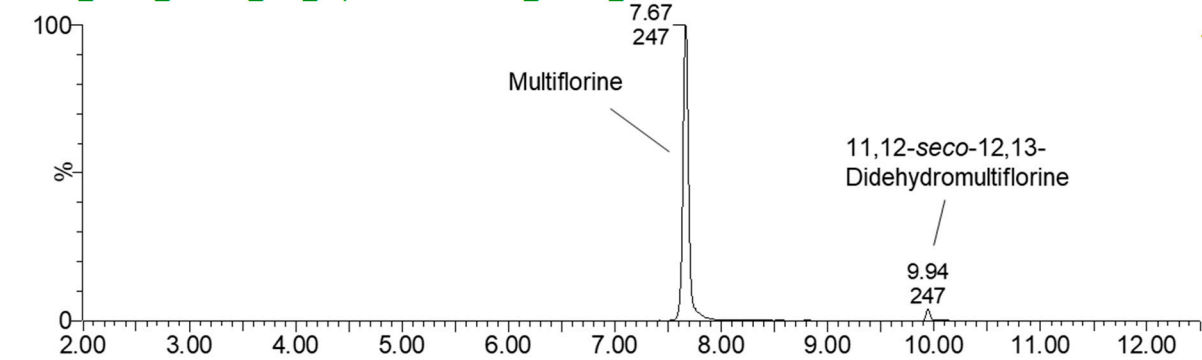

TQXS\_EURL\_220131\_LAs\_Lupine seeds Israel\_serie 2\_094

1: MRM of 27 Channels ES+  
Sum  
4.71e7

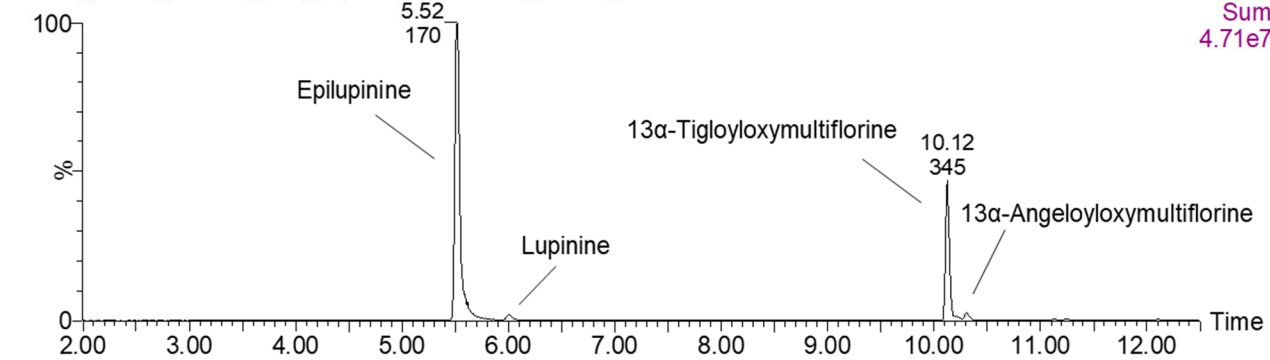

Supplementary Figure S2B: *Lupinus pilosus* (PIL-18).

101 / 21-1 / PA-02 dil 5x

TQXS\_EURL\_220203\_LAs\_Lupine seeds Israel\_serie 3\_089

3: MRM of 25 Channels ES+  
Sum  
1.91e7

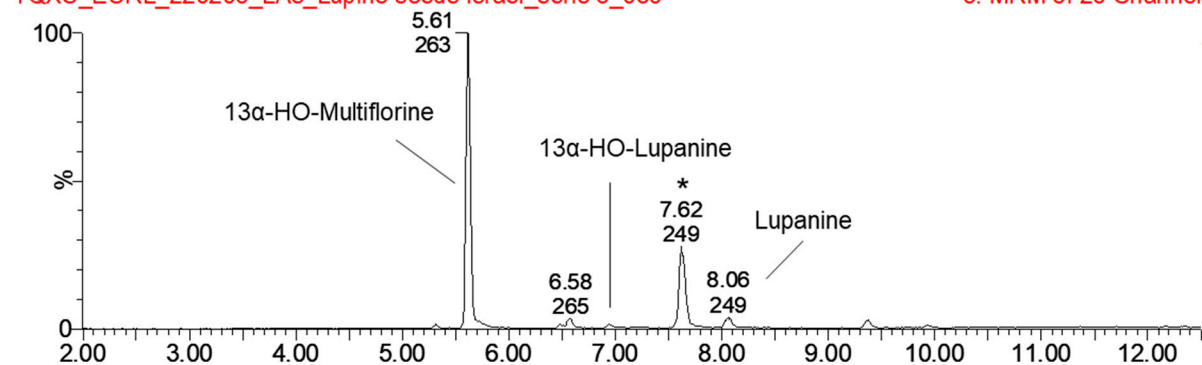

TQXS\_EURL\_220203\_LAs\_Lupine seeds Israel\_serie 3\_089

2: MRM of 21 Channels ES+  
TIC  
9.37e8

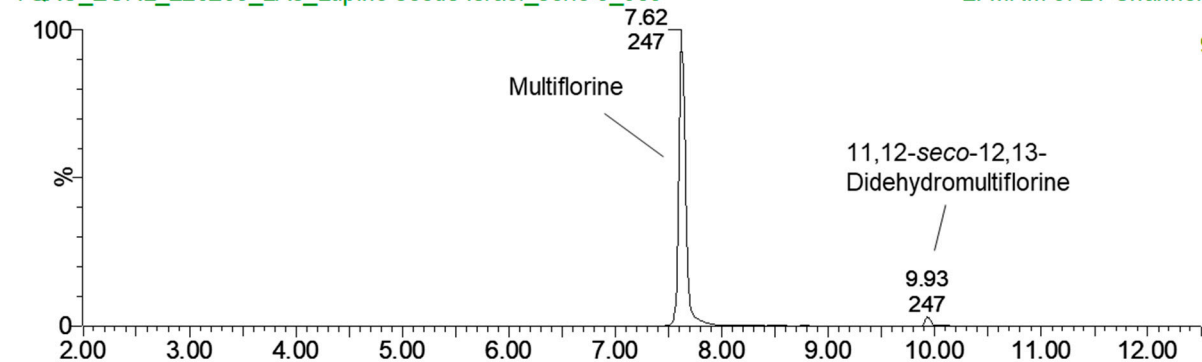

TQXS\_EURL\_220203\_LAs\_Lupine seeds Israel\_serie 3\_089

1: MRM of 27 Channels ES+  
Sum  
1.19e7

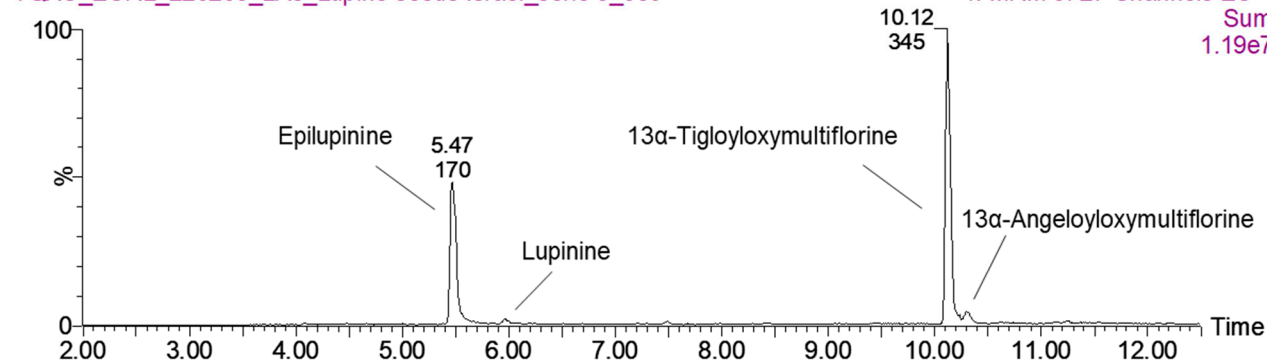

Supplementary Figure S2C: *Lupinus palaestinus* (PA-02).

156 / 32-1 / ALB-05 dil 5x

TQXS\_EURL\_220207\_LAs\_Lupine seeds Israel\_serie 4\_094

3: MRM of 25 Channels ES+  
TIC  
1.34e9

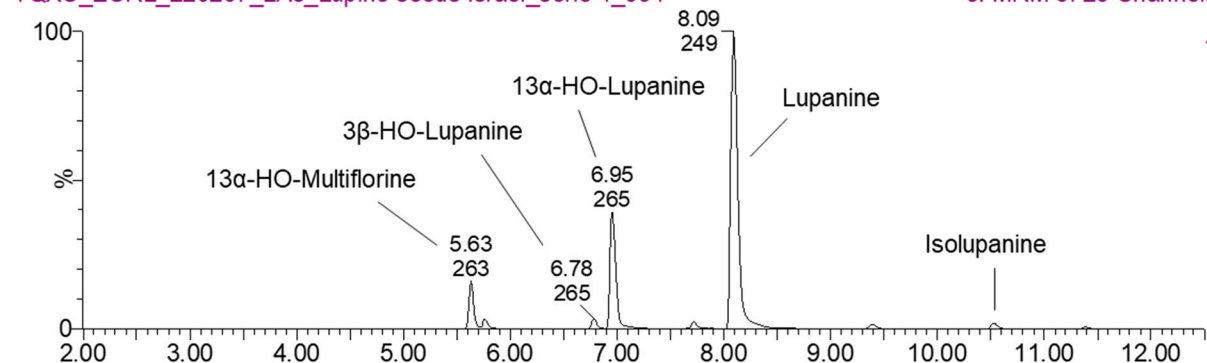

TQXS\_EURL\_220207\_LAs\_Lupine seeds Israel\_serie 4\_094

2: MRM of 21 Channels ES+  
Sum  
1.88e8

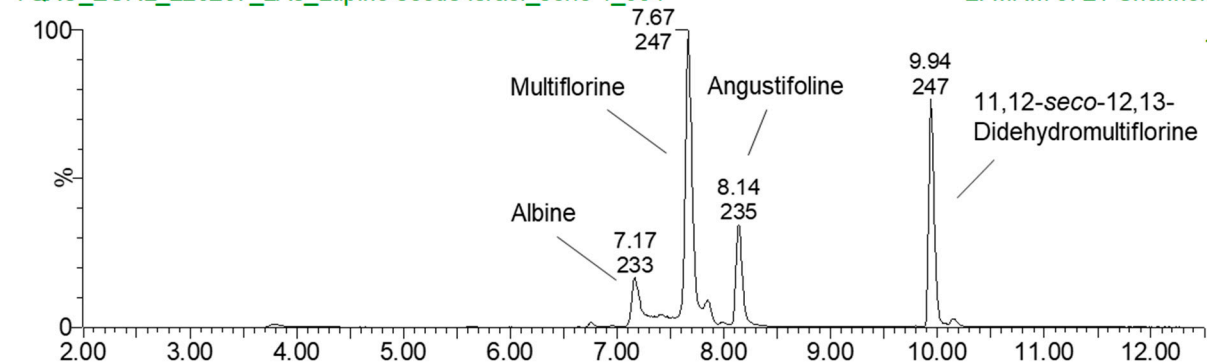

TQXS\_EURL\_220207\_LAs\_Lupine seeds Israel\_serie 4\_094

1: MRM of 27 Channels ES+  
TIC  
6.87e7

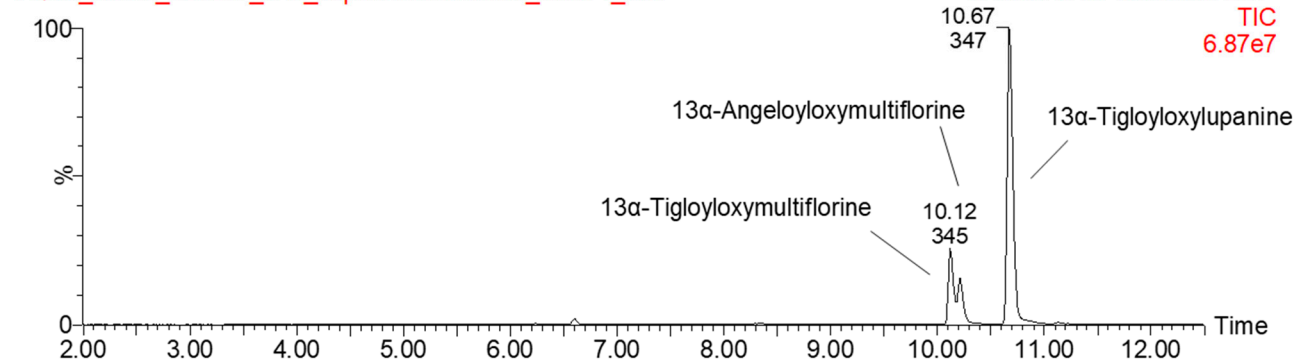

Supplementary Figure S2D: *Lupinus albus* (ALB-05).

176 / 36-1\* / ANG-sh dil 5x

TQXS\_EURL\_220207\_LAs\_Lupine seeds Israel\_serie 4\_114

3: MRM of 25 Channels ES+  
TIC  
1.64e9

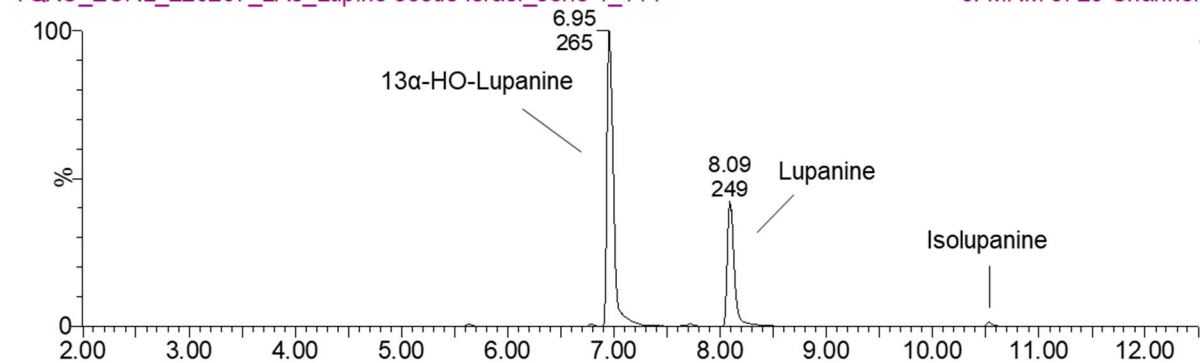

TQXS\_EURL\_220207\_LAs\_Lupine seeds Israel\_serie 4\_114

2: MRM of 21 Channels ES+  
TIC  
5.33e8

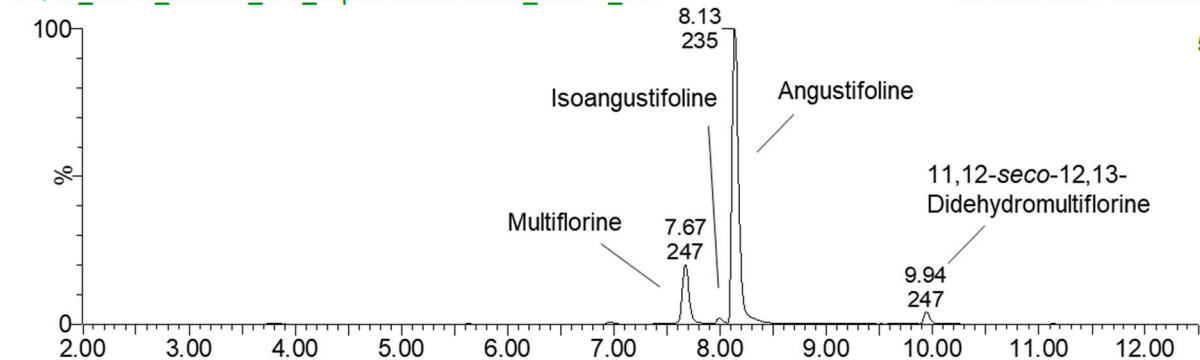

TQXS\_EURL\_220207\_LAs\_Lupine seeds Israel\_serie 4\_114

1: MRM of 27 Channels ES+  
TIC  
5.05e7

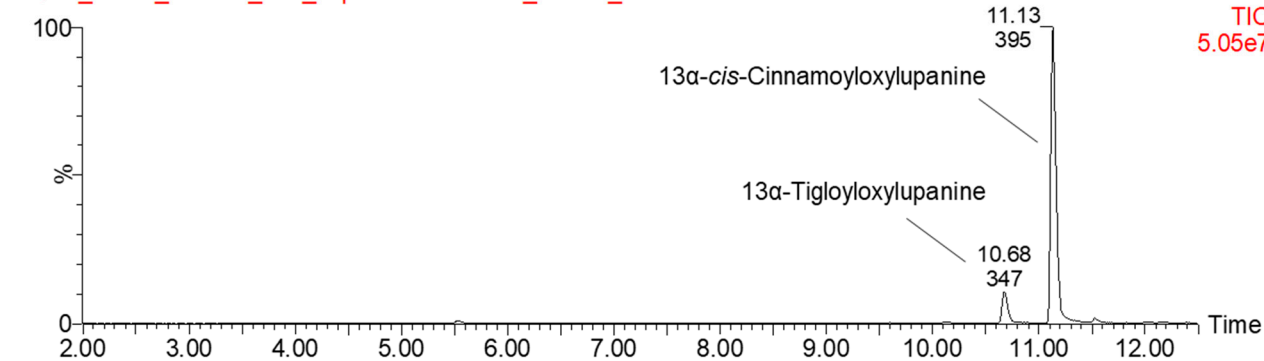

Supplementary Figure S2E: *Lupinus angustifolius* (ANG-sh).

181 / 37-1 / LUT-03 dil 5x

TQXS\_EURL\_220207\_LAs\_Lupine seeds Israel\_serie 4\_119

3: MRM of 25 Channels ES+  
TIC  
3.81e7

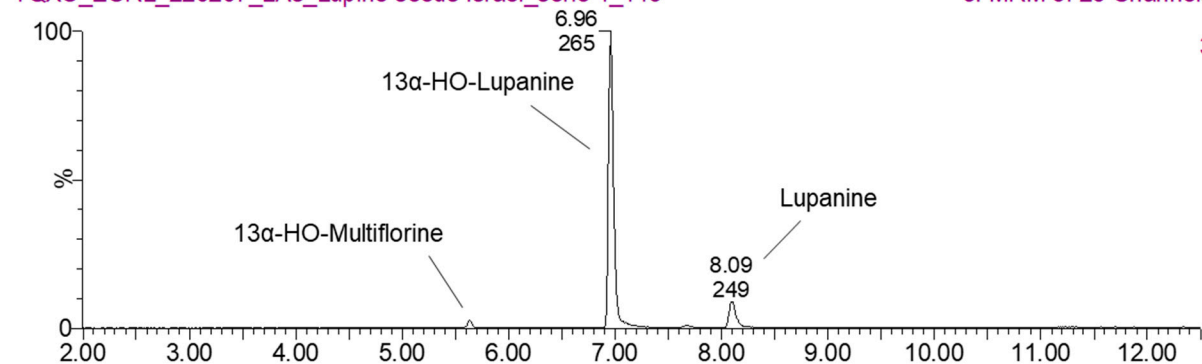

TQXS\_EURL\_220207\_LAs\_Lupine seeds Israel\_serie 4\_119

2: MRM of 21 Channels ES+  
TIC  
3.93e7

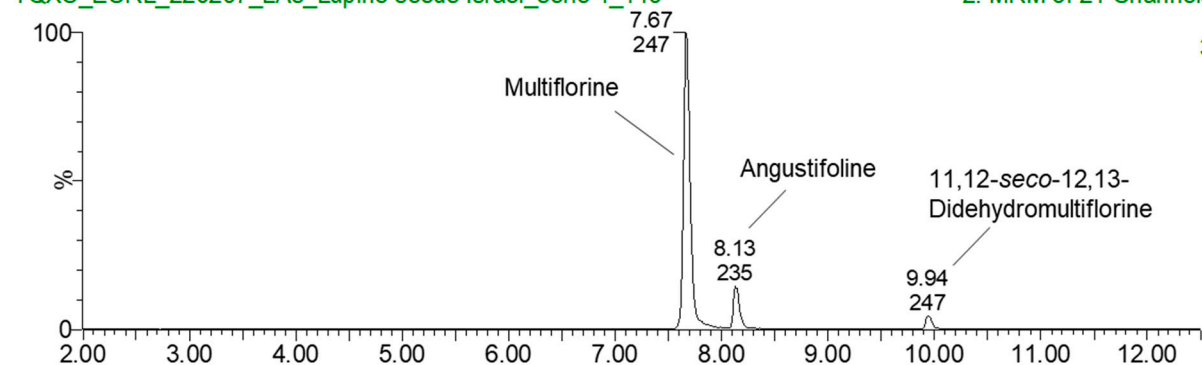

TQXS\_EURL\_220207\_LAs\_Lupine seeds Israel\_serie 4\_119

1: MRM of 27 Channels ES+  
TIC  
8.18e8

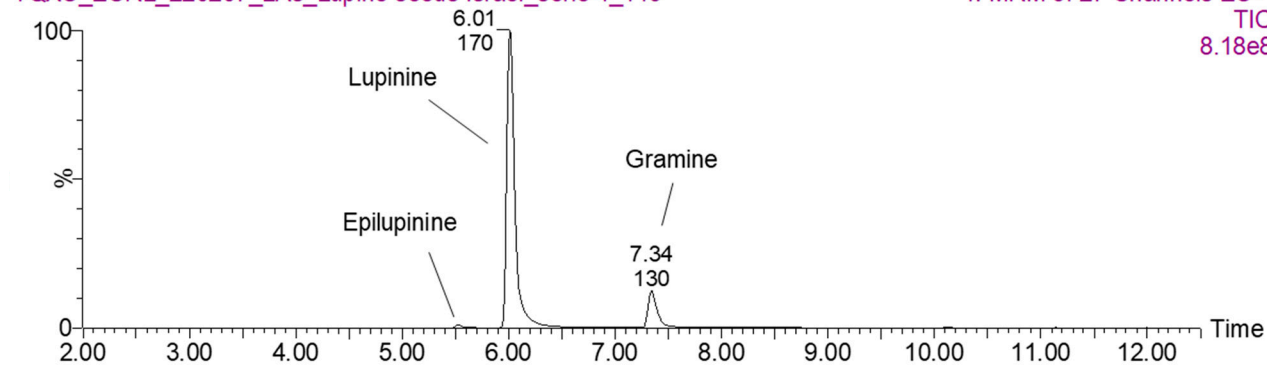

Supplementary Figure S2F: *Lupinus luteus* (LUT-03).

186 / 38-1 / MUT-01 dil 5x

TQXS\_EURL\_220207\_LAs\_Lupine seeds Israel\_serie 4\_124

3: MRM of 25 Channels ES+  
Sum  
1.08e9

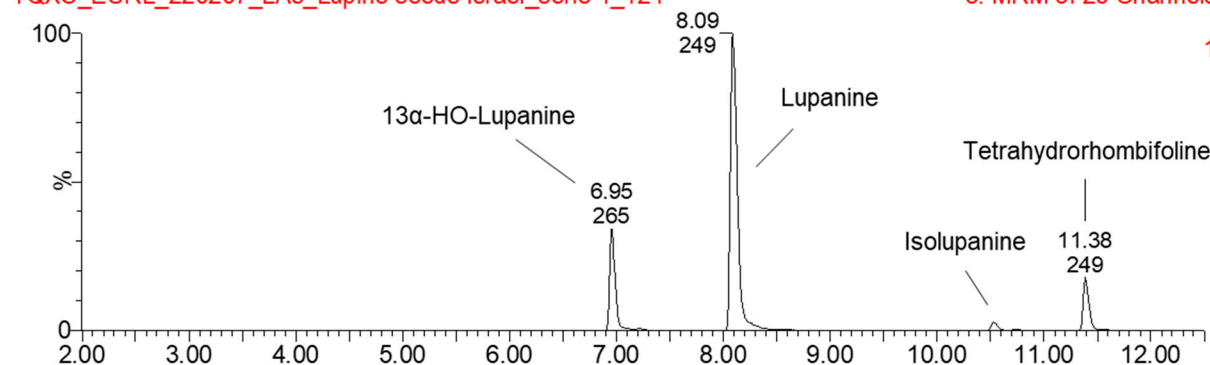

TQXS\_EURL\_220207\_LAs\_Lupine seeds Israel\_serie 4\_124

2: MRM of 21 Channels ES+  
TIC  
4.12e8

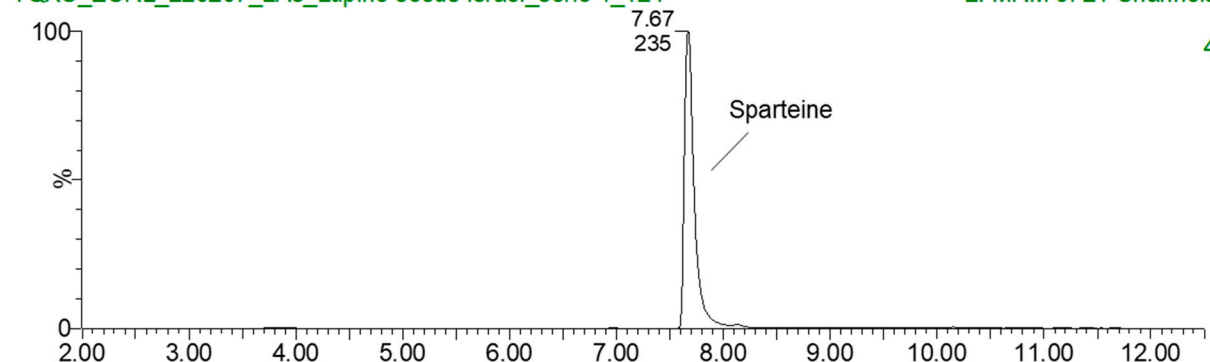

TQXS\_EURL\_220207\_LAs\_Lupine seeds Israel\_serie 4\_124

1: MRM of 27 Channels ES+  
Sum  
2.48e8

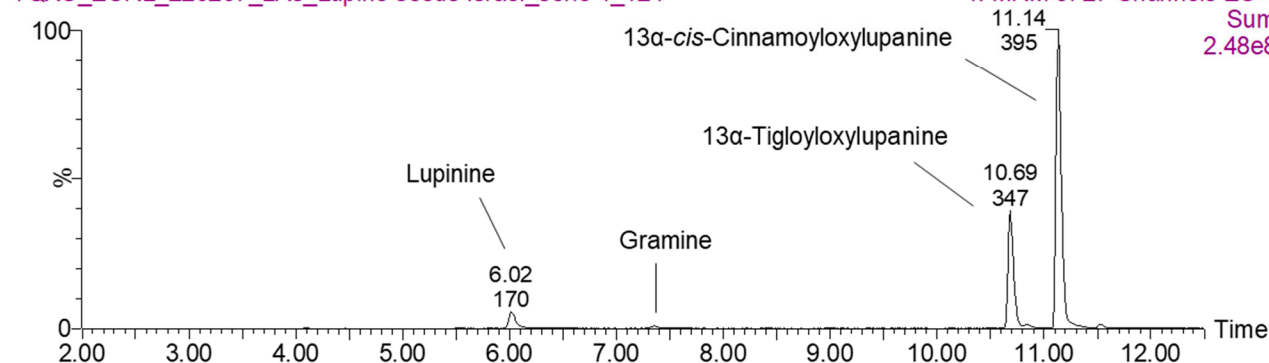

Supplementary Figure S2G: *Lupinus mutabilis* (MUT-01).
